# Supplementary material for: How Spectral Properties and Machine Learning Can Categorize Twin Species - Based on Diachrysia Genus
Source: Research Square preprint supplement (doi:10.21203/rs.3.rs-390055/v1), 2021-04-07
Supplement: Supplementary file 1 [file 025bb72f8980f8e0f25f7e9d.xlsx]

## Sheet: D.chrysitis
ID	Species	Sex	Year_catch	Day_catch	Locality	UTM_code	Longitude	Latitude	Feature_level
dc-1	Diachrysia chrysitis	♂	2016	168	Kaleńsko	VU63	52.64	14.54	3
dc-2	Diachrysia chrysitis	♂	2013	192	Słońsk	VU82	52.59	14.82	2
dc-3	Diachrysia chrysitis	♂	2013	215	Słońsk	VU82	52.59	14.82	3
dc-4	Diachrysia chrysitis	♂	2013	190	Kołomąć	WV06	53.86	15.11	3
dc-5	Diachrysia chrysitis	♂	2013	161	Słońsk	VU82	52.59	14.82	2
dc-6	Diachrysia chrysitis	♀	2010	162	Czelin	VU54	52.74	14.38	3
dc-7	Diachrysia chrysitis	♀	2016	160	Moczydło	WU16	52.92	15.28	3
dc-8	Diachrysia chrysitis	♂	2013	214	Kaleńsko	VU63	52.64	14.54	3
dc-9	Diachrysia chrysitis	♂	2013	214	Kaleńsko	VU63	52.64	14.54	3
dc-10	Diachrysia chrysitis	♂	2015	182	Kołomąć	WV06	53.86	15.11	2
dc-11	Diachrysia chrysitis	♂	2015	182	Kołomąć	WV06	53.86	15.11	1
dc-12	Diachrysia chrysitis	♂	2016	237	Kaleńsko	VU63	52.64	14.54	3
dc-13	Diachrysia chrysitis	♂	2015	156	Moczydło	WU16	52.92	15.28	3
dc-14	Diachrysia chrysitis	♂	2015	169	Kołomąć	WV06	53.86	15.11	3
dc-15	Diachrysia chrysitis	♂	2014	147	Kaleńsko	VU63	52.64	14.54	1
dc-16	Diachrysia chrysitis	♀	2015	182	Kołomąć	WV06	53.86	15.11	3
dc-17	Diachrysia chrysitis	♀	2011	151	Wiejce	WU53	52.64	15.76	1
dc-18	Diachrysia chrysitis	♂	2012	200	Świnoujście	VV56	53.85	14.3	2
dc-19	Diachrysia chrysitis	♂	2010	162	Czelin	VU54	52.74	14.38	3
dc-21	Diachrysia chrysitis	♀	2016	207	Kaleńsko	VU63	52.64	14.54	2
dc-22	Diachrysia chrysitis	♀	2011	147	Wiejce	WU53	52.64	15.76	2
dc-23	Diachrysia chrysitis	♂	2018	166	Rezerwat Góra Miedzianka	DB53	50.85	20.36	1
dc-24	Diachrysia chrysitis	♂	2018	145	Rezerwat Góra Miedzianka	DB53	50.85	20.36	1
dc-25	Diachrysia chrysitis	♂	2018	145	Rezerwat Góra Miedzianka	DB53	50.85	20.36	2
dc-26	Diachrysia chrysitis	♂	2018	145	Rezerwat Góra Miedzianka	DB53	50.85	20.36	2
dc-27	Diachrysia chrysitis	♂	2012	177	Świnoujście	VV56	53.85	14.3	3
dc-28	Diachrysia chrysitis	♂	2012	177	Świnoujście	VV56	53.85	14.3	3
dc-29	Diachrysia chrysitis	♂	2012	177	Świnoujście	VV56	53.85	14.3	2
dc-30	Diachrysia chrysitis	♂	2012	177	Świnoujście	VV56	53.85	14.3	3
dc-31	Diachrysia chrysitis	♂	2012	177	Świnoujście	VV56	53.85	14.3	2
dc-32	Diachrysia chrysitis	♀	2012	177	Świnoujście	VV56	53.85	14.3	3
dc-33	Diachrysia chrysitis	♂	2012	177	Świnoujście	VV56	53.85	14.3	3
dc-34	Diachrysia chrysitis	♂	2012	177	Świnoujście	VV56	53.85	14.3	3
dc-35	Diachrysia chrysitis	♂	2018	186	Mrzeżyno	WV19	54.13	15.28	3
dc-36	Diachrysia chrysitis	♂	2015	187	Mrzeżyno	WV19	54.13	15.28	3
dc-37	Diachrysia chrysitis	♂	2004	169	Czorsztyn	DV57	49.44	20.31	2
dc-38	Diachrysia chrysitis	♀	2015	187	Mrzeżyno	WV19	54.13	15.28	1
dc-39	Diachrysia chrysitis	♂	2017	204	Wynohradiw	FU53	48.15	23.08	3
dc-41	Diachrysia chrysitis	♂	1996	158	Woźniki	FC28	52.24	22.77	3
dc-42	Diachrysia chrysitis	♂	1999	242	Woźniki	FC28	52.24	22.77	3
dc-43	Diachrysia chrysitis	♂	2011	147	Wiejce	WU53	52.64	15.76	3
dc-44	Diachrysia chrysitis	♂	2011	176	Świnoujście	VV56	53.85	14.3	3
dc-45	Diachrysia chrysitis	♂	2017	181	Moczydło	WU16	52.92	15.28	1

## Sheet: D.stenochrysis
ID	Species	Sex	Year_catch	Day_catch	Locality	UTM_code	Longitude	Latitude	Feature_level
ds-1	Diachrysia stenochrysis	♀	2013	223	Słońsk	VU82	52.59	14.82	3
ds-2	Diachrysia stenochrysis	♂	2011	248	Kaleńsko	VU63	52.64	14.54	3
ds-3	Diachrysia stenochrysis	♀	2013	223	Słońsk	VU82	52.59	14.82	3
ds-4	Diachrysia stenochrysis	♂	2013	230	Słońsk	VU82	52.59	14.82	3
ds-5	Diachrysia stenochrysis	♀	2013	167	Słońsk	VU82	52.59	14.82	3
ds-6	Diachrysia stenochrysis	♀	2011	167	Wiejce	WU53	52.64	15.76	2
ds-7	Diachrysia stenochrysis	♂	2016	166	Moczydło	WU16	52.92	15.28	2
ds-8	Diachrysia stenochrysis	♀	2010	172	Czelin	VU54	52.74	14.38	3
ds-9	Diachrysia stenochrysis	♀	2016	241	Kaleńsko	VU63	52.64	14.54	2
ds-10	Diachrysia stenochrysis	♂	2010	168	Czelin	VU54	52.74	14.38	3
ds-11	Diachrysia stenochrysis	♂	2015	176	Kaleńsko	VU63	52.64	14.54	3
ds-12	Diachrysia stenochrysis	♂	2010	168	Czelin	VU54	52.74	14.38	2
ds-13	Diachrysia stenochrysis	♂	2014	159	Kaleńsko	VU63	52.64	14.54	3
ds-14	Diachrysia stenochrysis	♀	2016	214	Kaleńsko	VU63	52.64	14.54	3
ds-15	Diachrysia stenochrysis	♀	2011	152	Wiejce	WU53	52.64	15.76	3
ds-16	Diachrysia stenochrysis	♂	2018	149	Daleszyce	DB82	50.79	20.8	3
ds-17	Diachrysia stenochrysis	♂	2017	211	Wynohradiw	FU53	48.15	23.08	3
ds-18	Diachrysia stenochrysis	♂	2018	172	Rezerwat Góra Miedzianka	DB53	50.85	20.36	3
ds-19	Diachrysia stenochrysis	♀	2018	172	Rezerwat Góra Miedzianka	DB53	50.85	20.36	2
ds-20	Diachrysia stenochrysis	♂	2017	211	Wynohradiw	FU53	48.15	23.08	3
ds-21	Diachrysia stenochrysis	♂	2015	177	Bagno Ławki BPN	FE00	53.29	22.54	3
ds-22	Diachrysia stenochrysis	♂	2016	181	Rezerwat Bielinek	VU46	52.92	14.17	3
ds-23	Diachrysia stenochrysis	♂	2005	251	Czorsztyn Zamek	DV57	49.44	20.31	3
ds-24	Diachrysia stenochrysis	♂	2015	177	Bagno Ławki BPN	FE00	53.29	22.54	3
ds-25	Diachrysia stenochrysis	♂	2016	246	Mrzeżyno	WV19	54.13	15.28	3
ds-26	Diachrysia stenochrysis	♀	2018	168	Winiary	DA78	50.43	20.62	3
ds-27	Diachrysia stenochrysis	♂	2018	213	Słopiec	DB82	50.77	20.76	2
ds-28	Diachrysia stenochrysis	♂	2018	197	Winiary	DA78	50.43	20.62	2
ds-29	Diachrysia stenochrysis	♀	2018	197	Winiary	DA78	50.43	20.62	3
ds-30	Diachrysia stenochrysis	♀	2018	197	Winiary	DA78	50.43	20.62	1
ds-31	Diachrysia stenochrysis	♀	2012	183	Świnoujście	VV56	53.85	14.3	3
ds-32	Diachrysia stenochrysis	♀	2012	183	Świnoujście	VV56	53.85	14.3	2
ds-34	Diachrysia stenochrysis	♂	2012	183	Świnoujście	VV56	53.85	14.3	1
ds-35	Diachrysia stenochrysis	♂	2012	183	Świnoujście	VV56	53.85	14.3	2
ds-36	Diachrysia stenochrysis	♂	2012	183	Świnoujście	VV56	53.85	14.3	3
ds-37	Diachrysia stenochrysis	♂	2012	183	Świnoujście	VV56	53.85	14.3	2
ds-38	Diachrysia stenochrysis	♂	1999	150	Woźniki	FC28	52.24	14.3	2
ds-39	Diachrysia stenochrysis	♂	1999	223	Woźniki	FC28	52.24	22.77	2
ds-40	Diachrysia stenochrysis	♀	1997	160	Woźniki	FC28	52.24	22.77	3
ds-41	Diachrysia stenochrysis	♀	1995	187	Woźniki	FC28	52.24	22.77	3
ds-42	Diachrysia stenochrysis	♂	1995	151	Woźniki	FC28	52.24	22.77	3
ds-43	Diachrysia stenochrysis	♂	1997	147	Woźniki	FC28	52.24	22.77	2
ds-44	Diachrysia stenochrysis	♂	2002	148	Mirów	CB90	50.62	19.48	3
ds-45	Diachrysia stenochrysis	♀	2006	246	Czorsztyn Zamek	DV57	49.44	20.31	2
ds-46	Diachrysia stenochrysis	♀	2002	198	Biedrusko - Poligon	XU32	52.56	16.9	2
ds-47	Diachrysia stenochrysis	♂	1999	230	Kępno	YS08	51.27	17.97	3
ds-48	Diachrysia stenochrysis	♂	2010	221	Góra ad Promno	XU51	52.45	17.21	3
ds-49	Diachrysia stenochrysis	♂	1959	230	Kortowo	DE65	53.76	20.45	2
ds-50	Diachrysia stenochrysis	♂	2018	269	Winiary	DA78	50.43	20.62	3
ds-51	Diachrysia stenochrysis	♂	2018	269	Winiary	DA78	50.43	20.62	3
ds-52	Diachrysia stenochrysis	♂	2018	269	Winiary	DA78	50.43	20.62	3
ds-53	Diachrysia stenochrysis	♂	2018	269	Winiary	DA78	50.43	20.62	3
